# Supplementary material for: Integrated Analysis of Genome-Wide Copy Number Alterations and Gene Expression Profiling of Lung Cancer in Xuanwei, China
Source: PubMed Central journal article supplement (PMC5215791; doi:10.1371/journal.pone.0169098), 2017-01-05

chr1 segmentation for 529550A03\_2013-06-26\_532 vs. 529550A03\_2013-06-26\_635 (529550A03\_2013-06-26\_unavg) - 1 segment

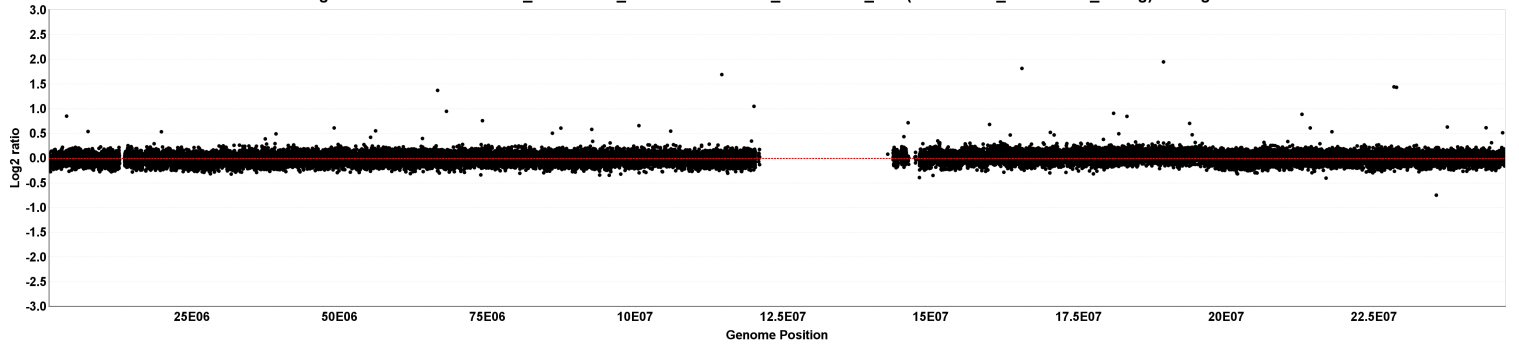

chr2 segmentation for 529550A03\_2013-06-26\_532 vs. 529550A03\_2013-06-26\_635 (529550A03\_2013-06-26\_unavg) - 1 segment

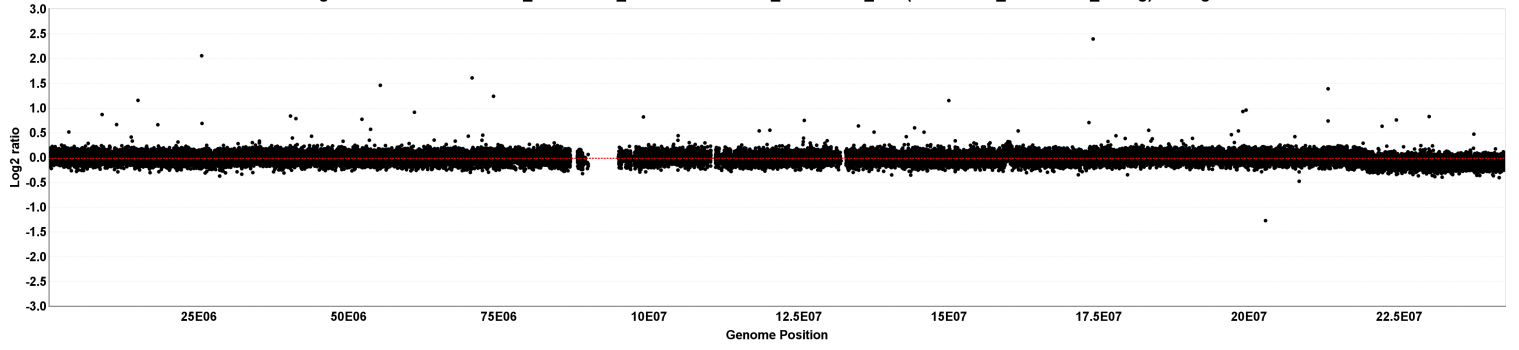

chr3 segmentation for 529550A03\_2013-06-26\_532 vs. 529550A03\_2013-06-26\_635 (529550A03\_2013-06-26\_unavg) - 1 segment

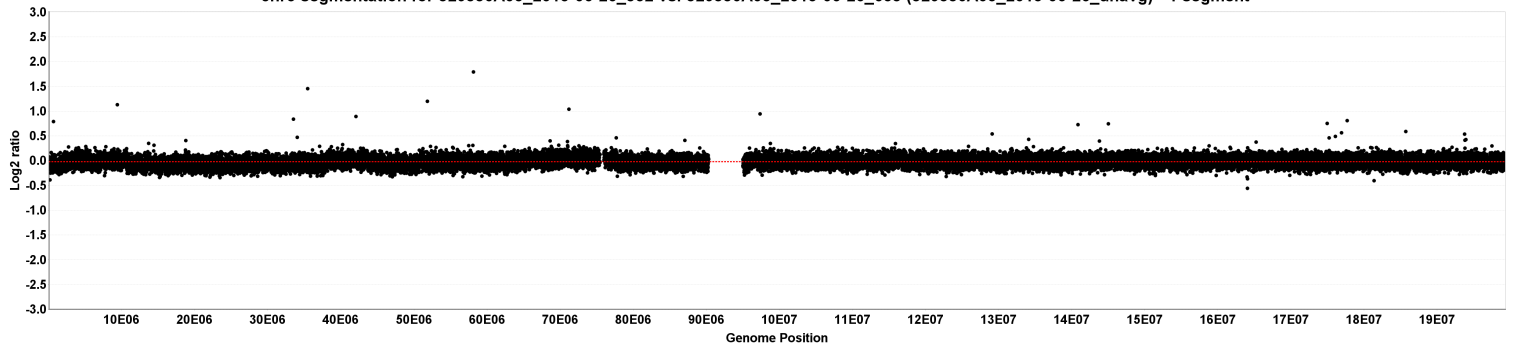

chr4 segmentation for 529550A03\_2013-06-26\_532 vs. 529550A03\_2013-06-26\_635 (529550A03\_2013-06-26\_unavg) - 1 segment

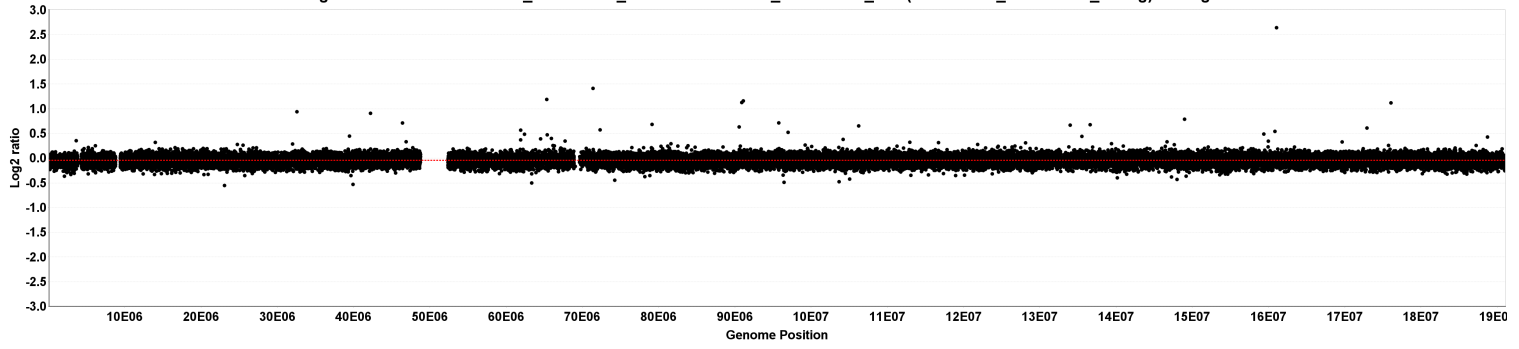

chr5 segmentation for 529550A03\_2013-06-26\_532 vs. 529550A03\_2013-06-26\_635 (529550A03\_2013-06-26\_unavg) - 1 segment

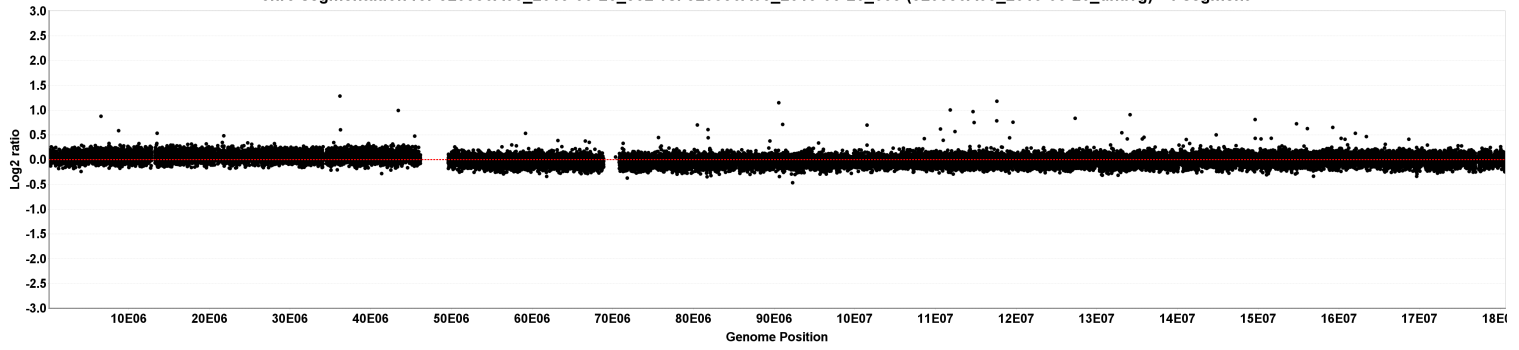

chr6 segmentation for 529550A03\_2013-06-26\_532 vs. 529550A03\_2013-06-26\_635 (529550A03\_2013-06-26\_unavg) - 1 segment

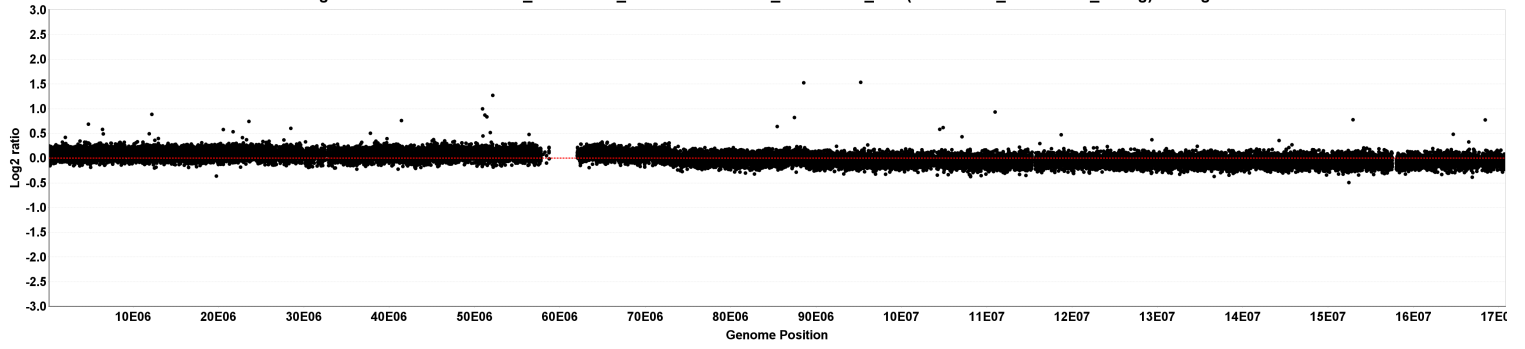

chr7 segmentation for 529550A03\_2013-06-26\_532 vs. 529550A03\_2013-06-26\_635 (529550A03\_2013-06-26\_unavg) - 1 segment

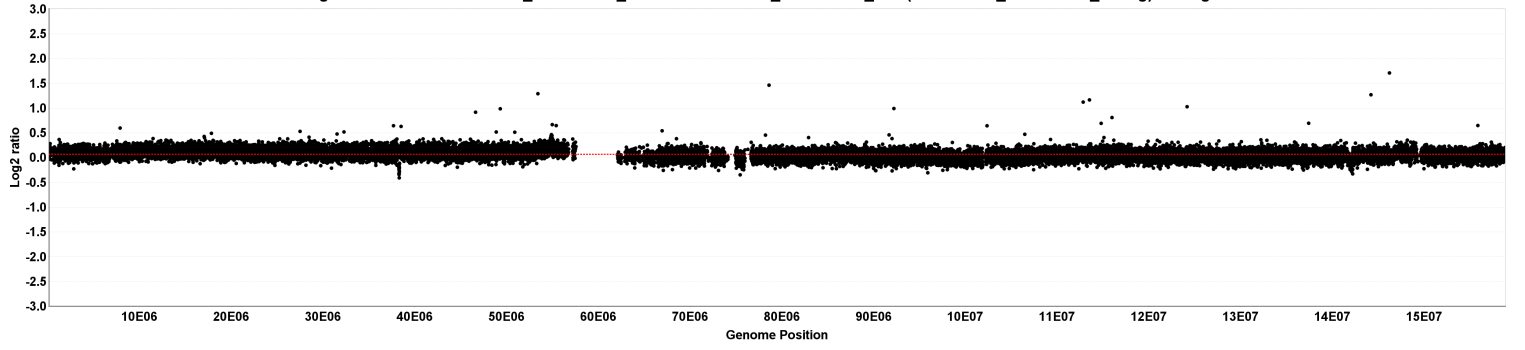

chr8 segmentation for 529550A03\_2013-06-26\_532 vs. 529550A03\_2013-06-26\_635 (529550A03\_2013-06-26\_unavg) - 1 segment

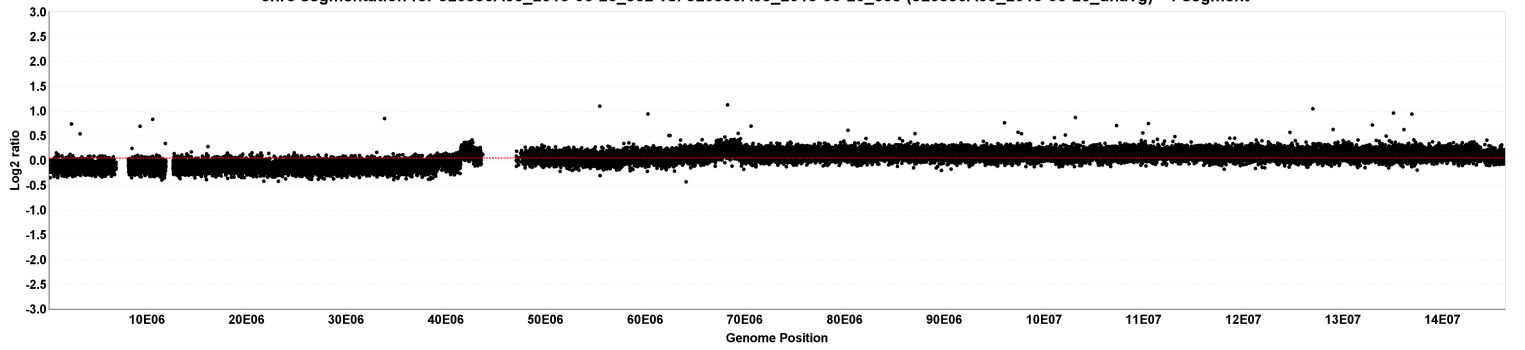

chr9 segmentation for 529550A03\_2013-06-26\_532 vs. 529550A03\_2013-06-26\_635 (529550A03\_2013-06-26\_unavg) - 1 segment

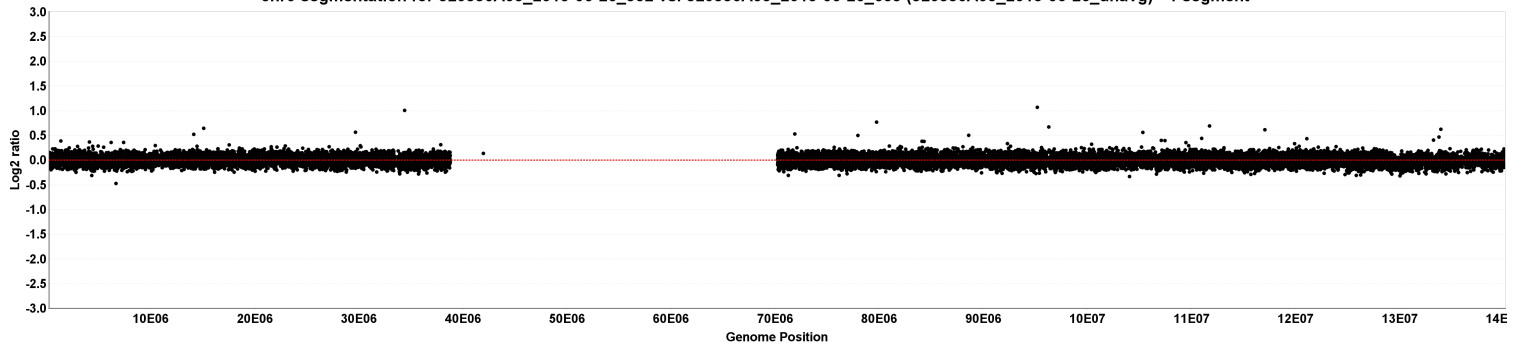

chr10 segmentation for 529550A03\_2013-06-26\_532 vs. 529550A03\_2013-06-26\_635 (529550A03\_2013-06-26\_unavg) - 1 segment

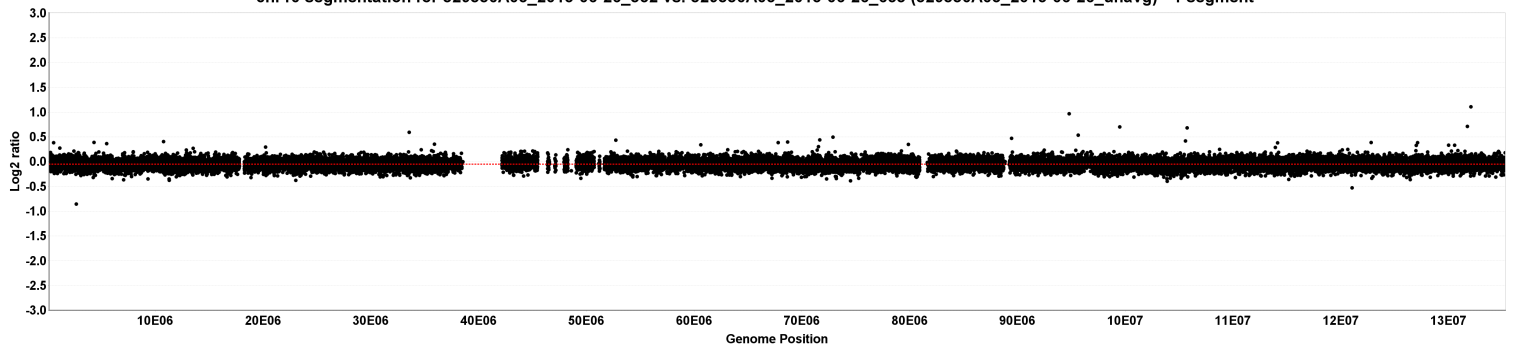

chr11 segmentation for 529550A03\_2013-06-26\_532 vs. 529550A03\_2013-06-26\_635 (529550A03\_2013-06-26\_unavg) - 1 segment

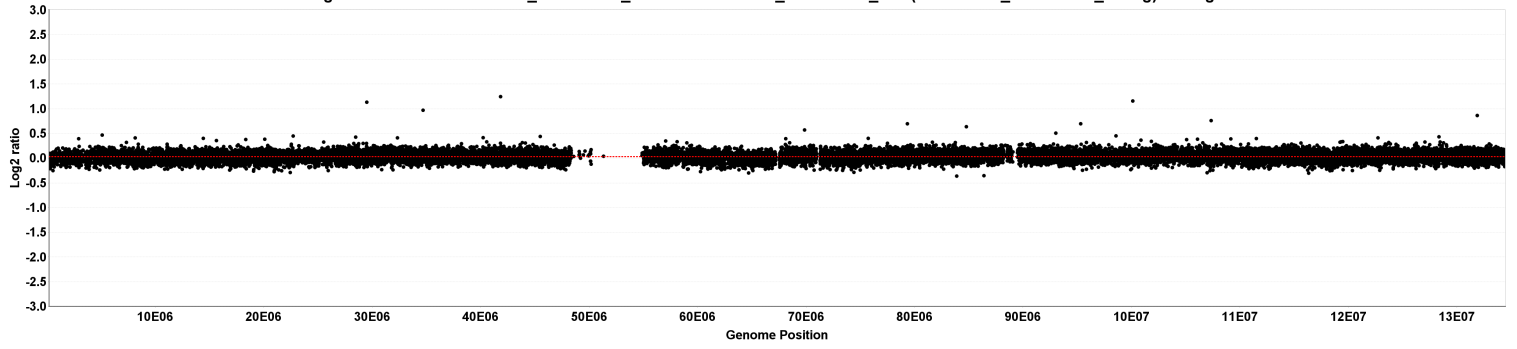

chr12 segmentation for 529550A03\_2013-06-26\_532 vs. 529550A03\_2013-06-26\_635 (529550A03\_2013-06-26\_unavg) - 1 segment

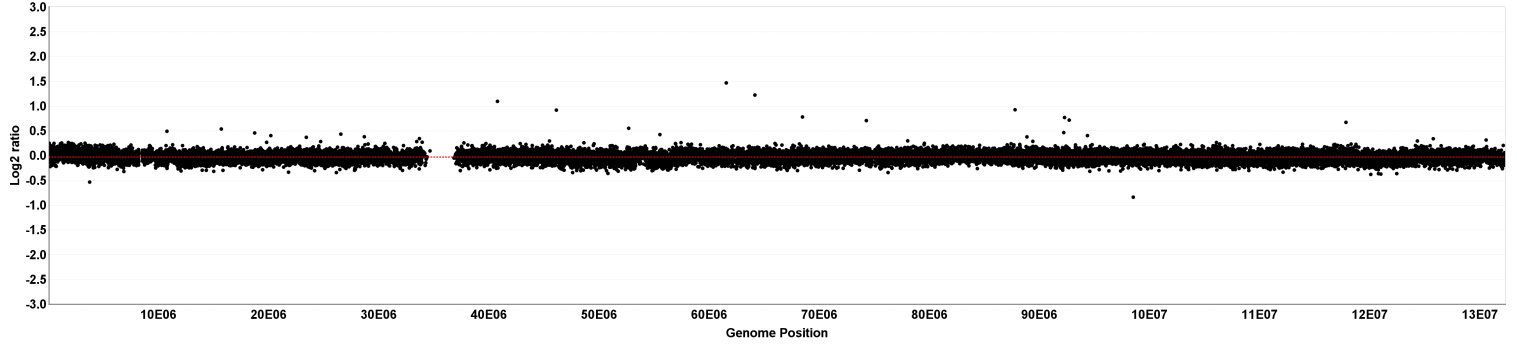

chr13 segmentation for 529550A03\_2013-06-26\_532 vs. 529550A03\_2013-06-26\_635 (529550A03\_2013-06-26\_unavg) - 1 segment

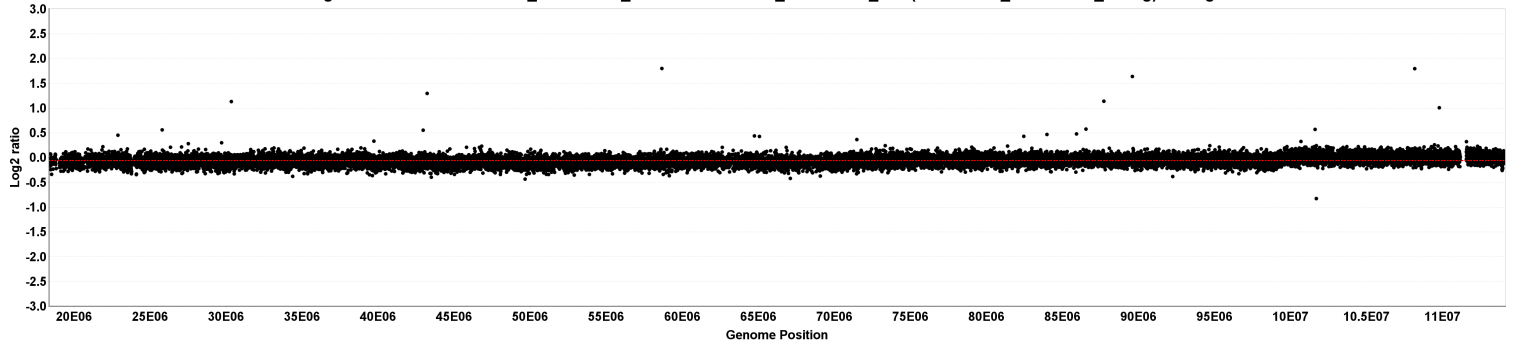

chr14 segmentation for 529550A03\_2013-06-26\_532 vs. 529550A03\_2013-06-26\_635 (529550A03\_2013-06-26\_unavg) - 6 segments

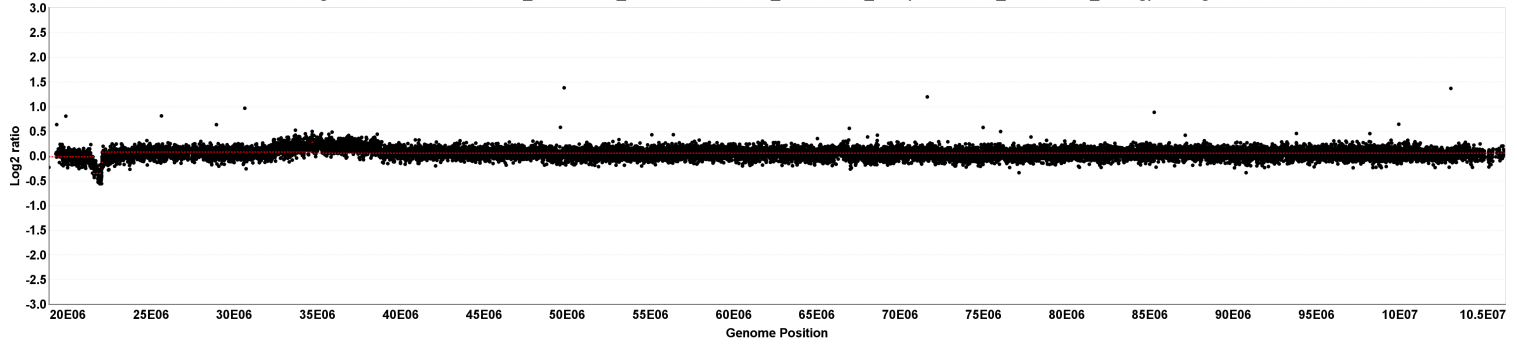

chr15 segmentation for 529550A03\_2013-06-26\_532 vs. 529550A03\_2013-06-26\_635 (529550A03\_2013-06-26\_unavg) - 5 segments

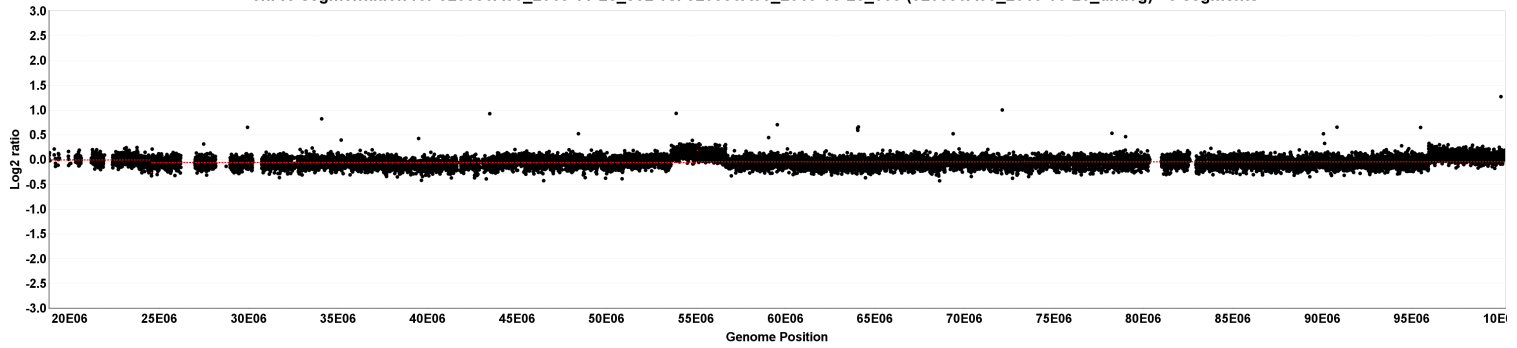

chr16 segmentation for 529550A03\_2013-06-26\_532 vs. 529550A03\_2013-06-26\_635 (529550A03\_2013-06-26\_unavg) - 1 segment

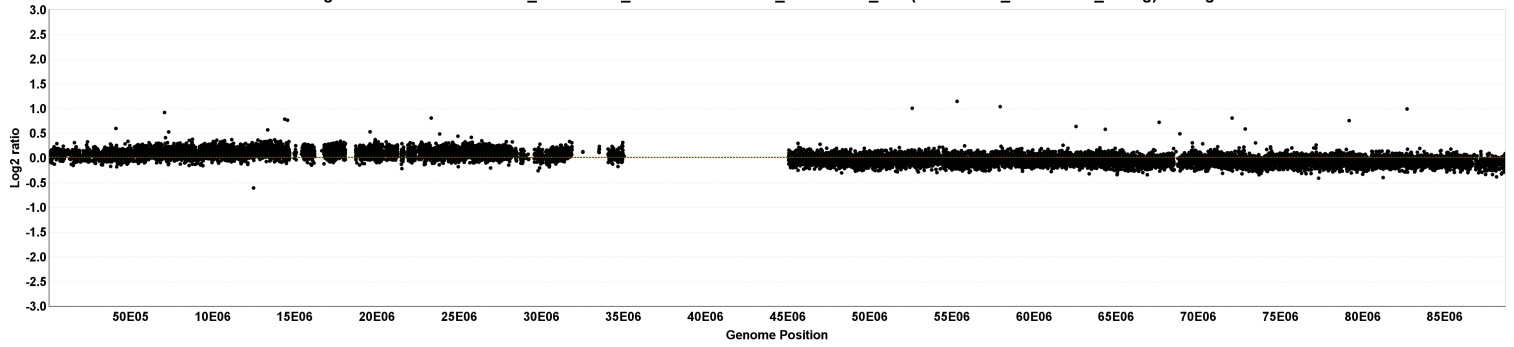

chr17 segmentation for 529550A03\_2013-06-26\_532 vs. 529550A03\_2013-06-26\_635 (529550A03\_2013-06-26\_unavg) - 1 segment

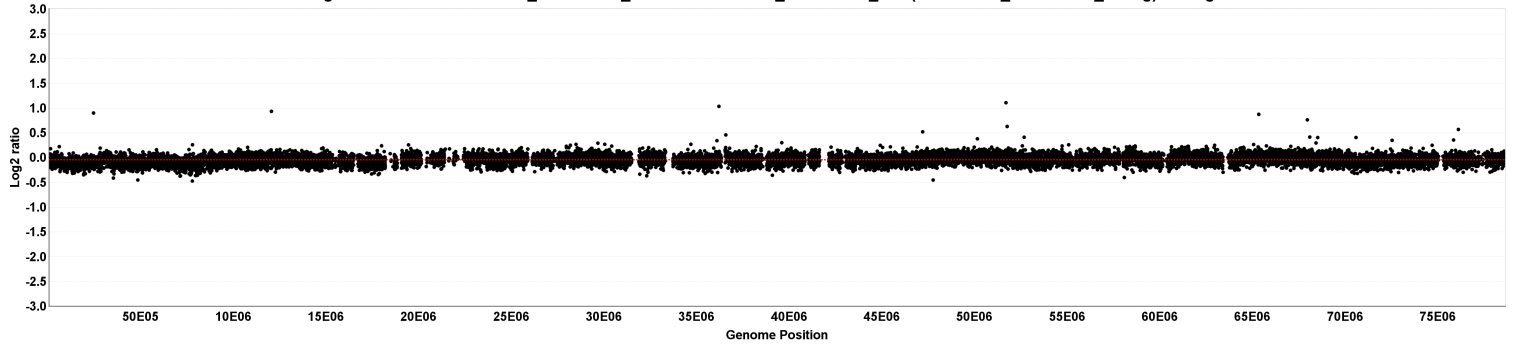

chr18 segmentation for 529550A03\_2013-06-26\_532 vs. 529550A03\_2013-06-26\_635 (529550A03\_2013-06-26\_unavg) - 1 segment

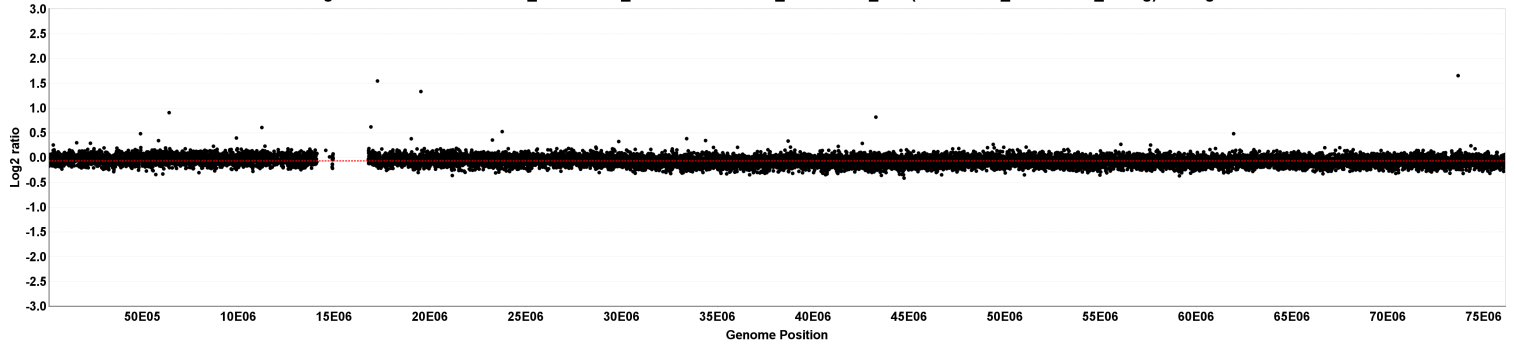

chr19 segmentation for 529550A03\_2013-06-26\_532 vs. 529550A03\_2013-06-26\_635 (529550A03\_2013-06-26\_unavg) - 1 segment

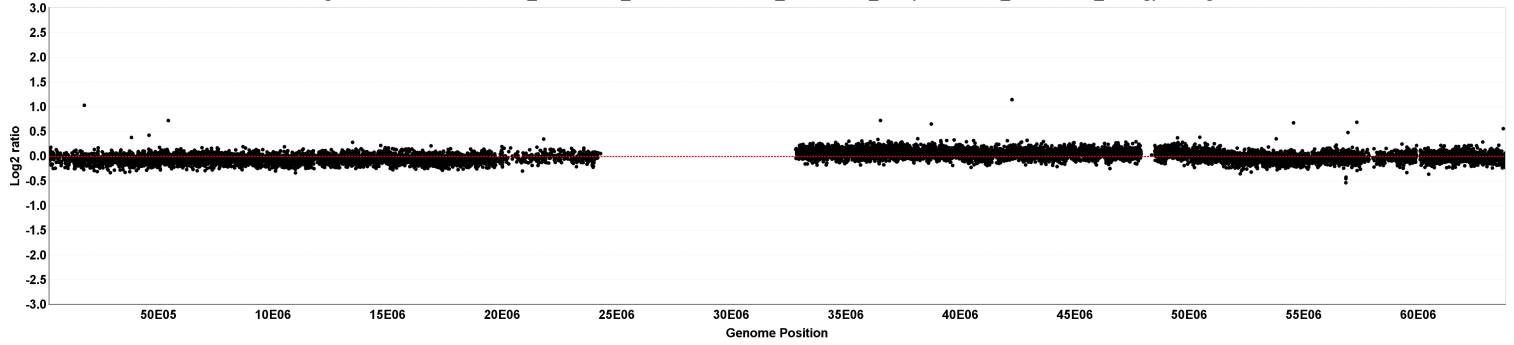

chr20 segmentation for 529550A03\_2013-06-26\_532 vs. 529550A03\_2013-06-26\_635 (529550A03\_2013-06-26\_unavg) - 7 segments

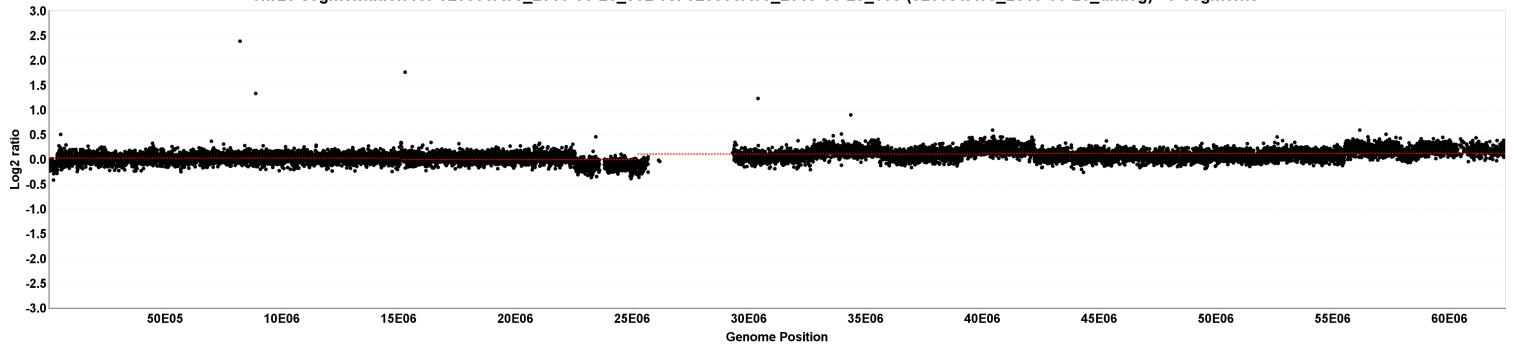

chr21 segmentation for 529550A03\_2013-06-26\_532 vs. 529550A03\_2013-06-26\_635 (529550A03\_2013-06-26\_unavg) - 1 segment

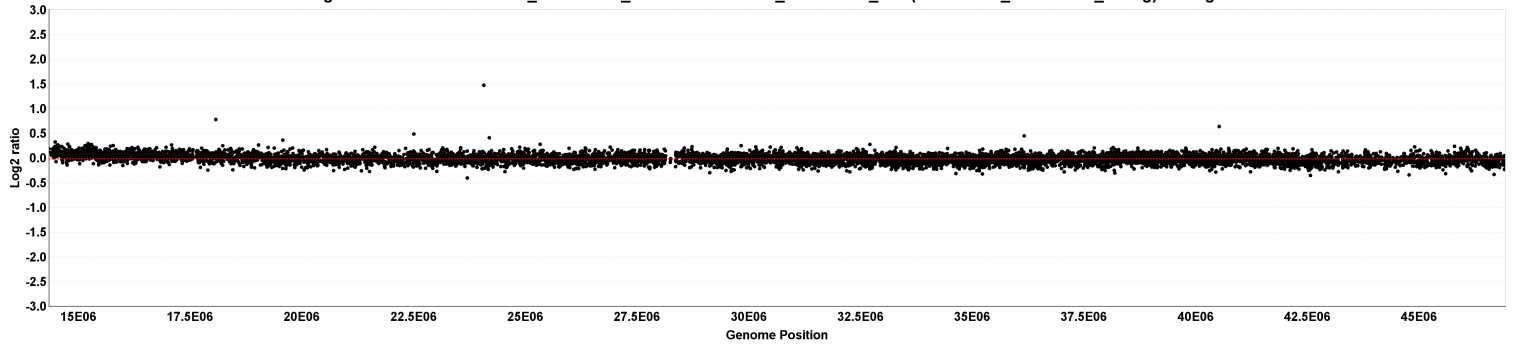

chr22 segmentation for 529550A03\_2013-06-26\_532 vs. 529550A03\_2013-06-26\_635 (529550A03\_2013-06-26\_unavg) - 1 segment

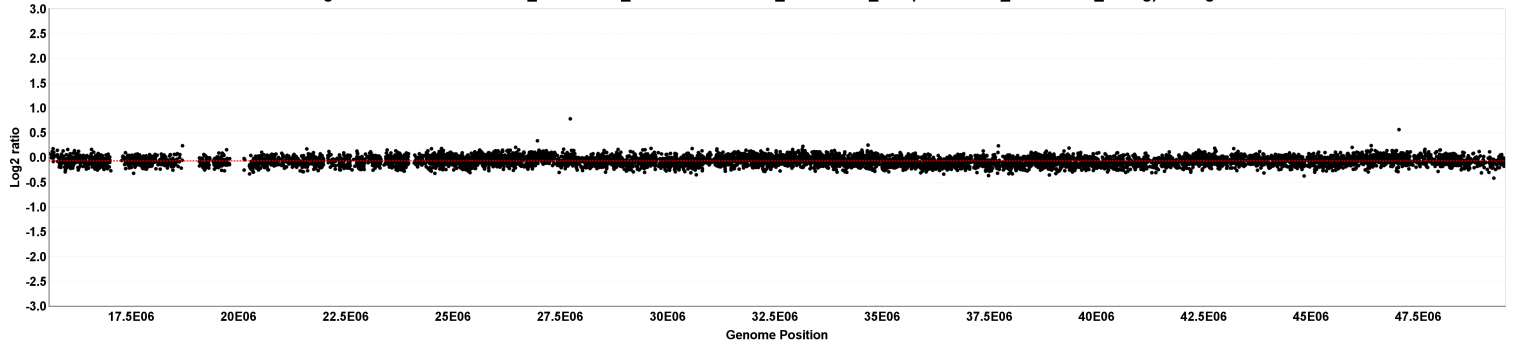

chrX segmentation for 529550A03\_2013-06-26\_532 vs. 529550A03\_2013-06-26\_635 (529550A03\_2013-06-26\_unavg) - 1 segment

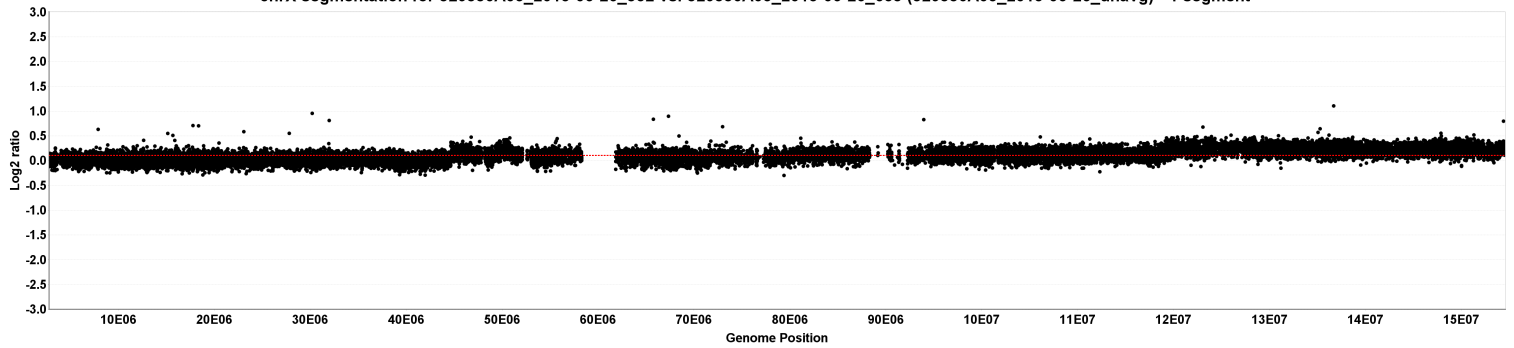

chrY segmentation for 529550A03\_2013-06-26\_532 vs. 529550A03\_2013-06-26\_635 (529550A03\_2013-06-26\_unavg) - 1 segment

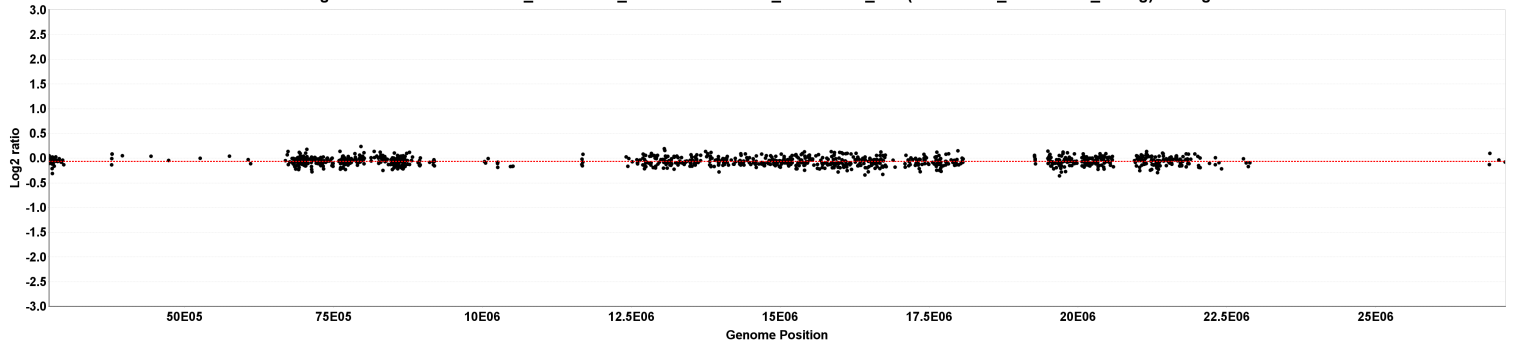

Supplement: pone.0169098.s003.pdf [file pone.0169098.s003.pdf]
