# Supplementary material for: Integrated Analysis of Genome-Wide Copy Number Alterations and Gene Expression Profiling of Lung Cancer in Xuanwei, China
Source: PubMed Central journal article supplement (PMC5215791; doi:10.1371/journal.pone.0169098), 2017-01-05

chr1 segmentation for 529552A02\_2013-06-20\_532 vs. 529552A02\_2013-06-20\_635 (529552A02\_2013-06-20\_unavg) - 4 segments

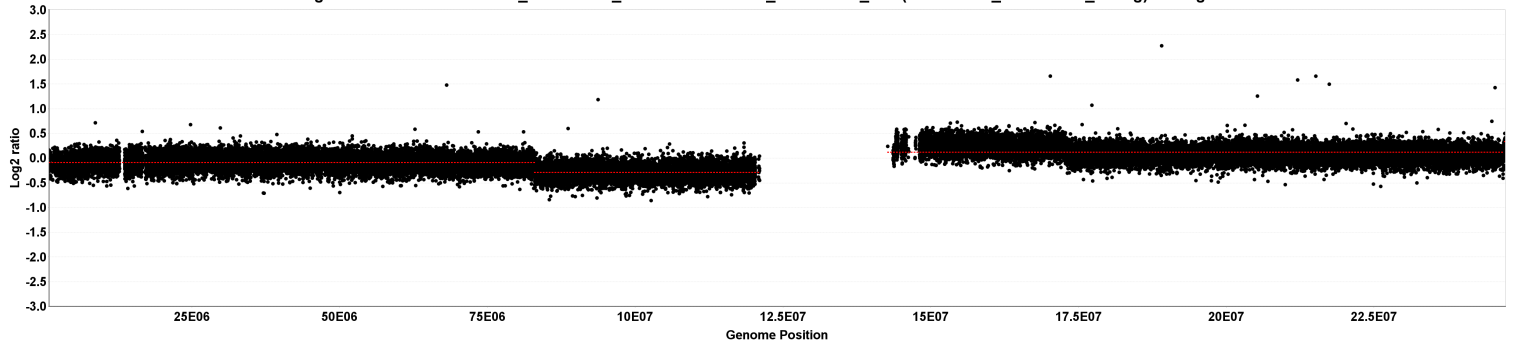

chr2 segmentation for 529552A02\_2013-06-20\_532 vs. 529552A02\_2013-06-20\_635 (529552A02\_2013-06-20\_unavg) - 9 segments

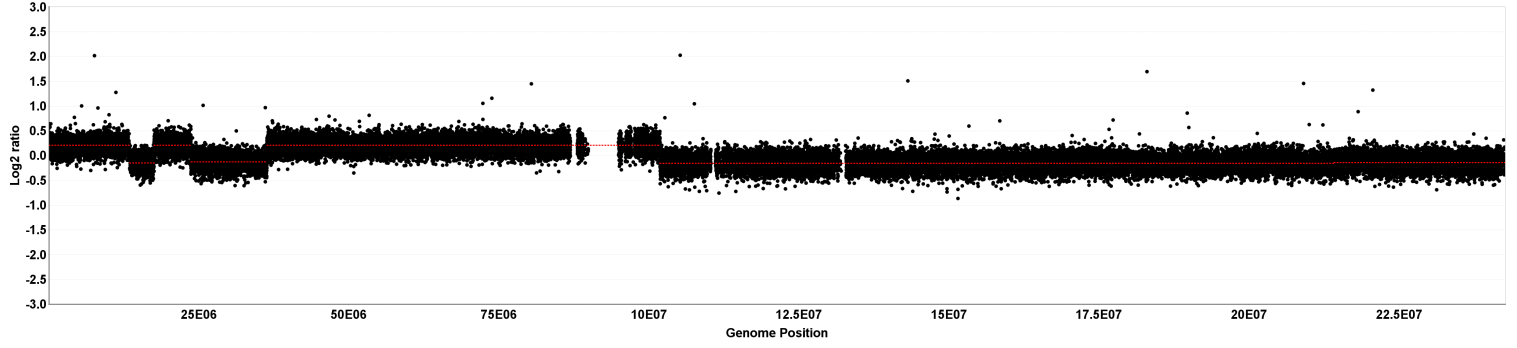

chr3 segmentation for 529552A02\_2013-06-20\_532 vs. 529552A02\_2013-06-20\_635 (529552A02\_2013-06-20\_unavg) - 26 segments

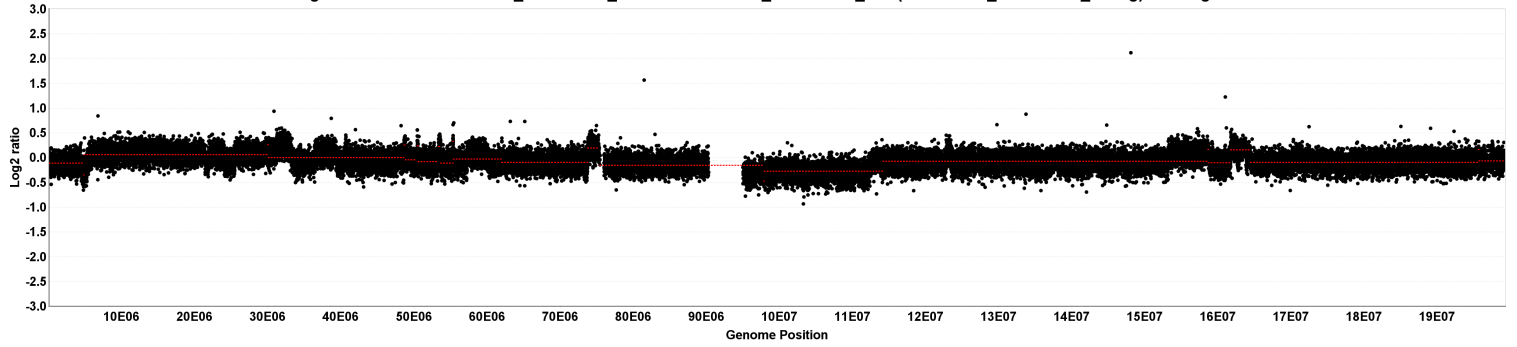

chr4 segmentation for 529552A02\_2013-06-20\_532 vs. 529552A02\_2013-06-20\_635 (529552A02\_2013-06-20\_unavg) - 7 segments

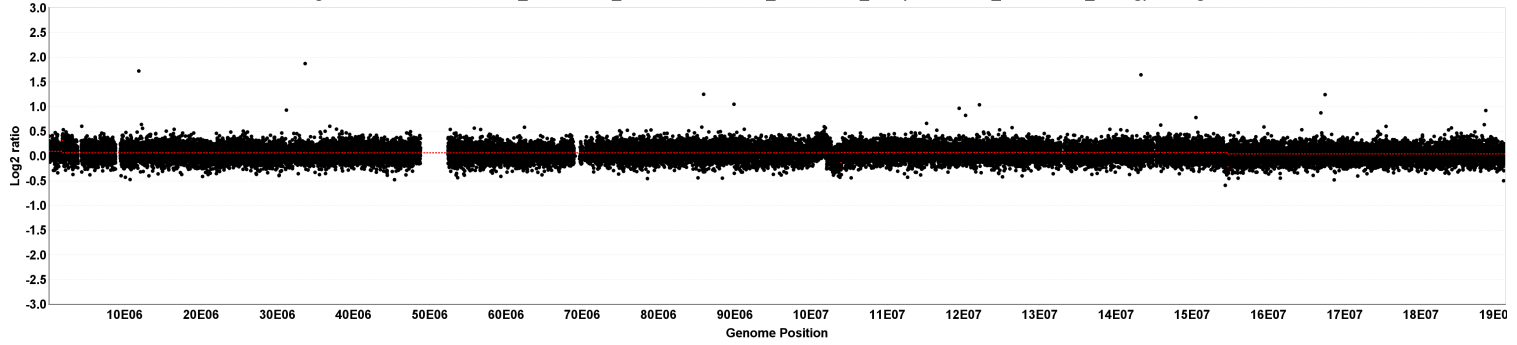

chr5 segmentation for 529552A02\_2013-06-20\_532 vs. 529552A02\_2013-06-20\_635 (529552A02\_2013-06-20\_unavg) - 15 segments

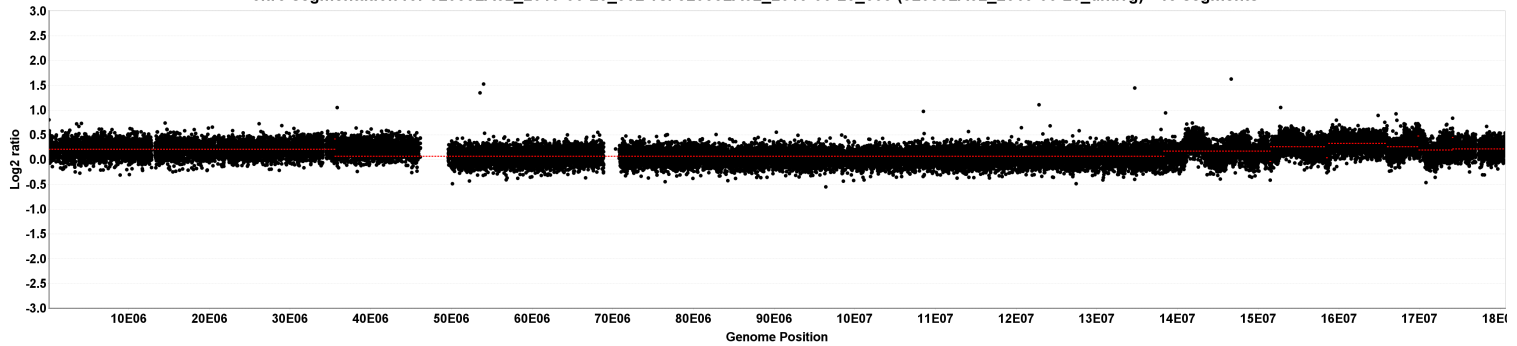

chr6 segmentation for 529552A02\_2013-06-20\_532 vs. 529552A02\_2013-06-20\_635 (529552A02\_2013-06-20\_unavg) - 15 segments

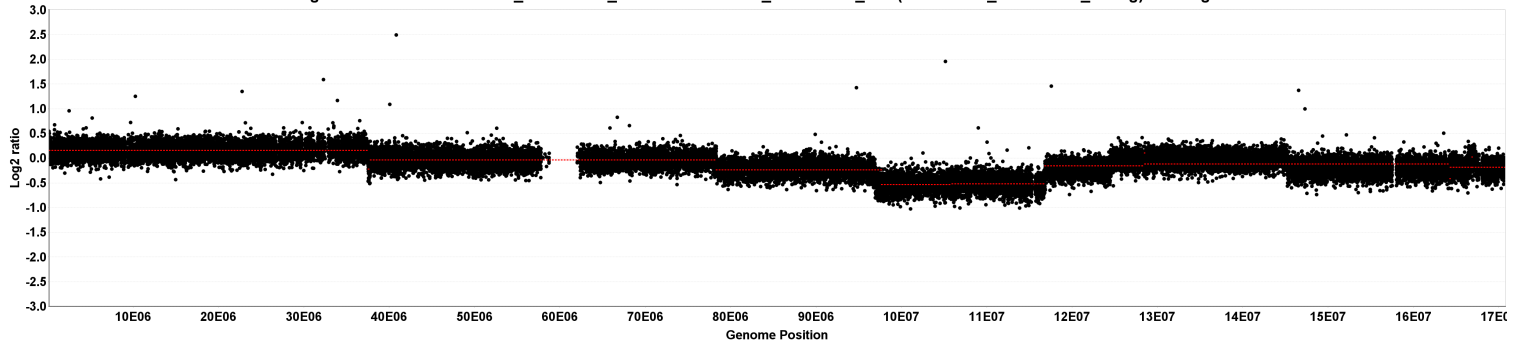

chr7 segmentation for 529552A02\_2013-06-20\_532 vs. 529552A02\_2013-06-20\_635 (529552A02\_2013-06-20\_unavg) - 14 segments

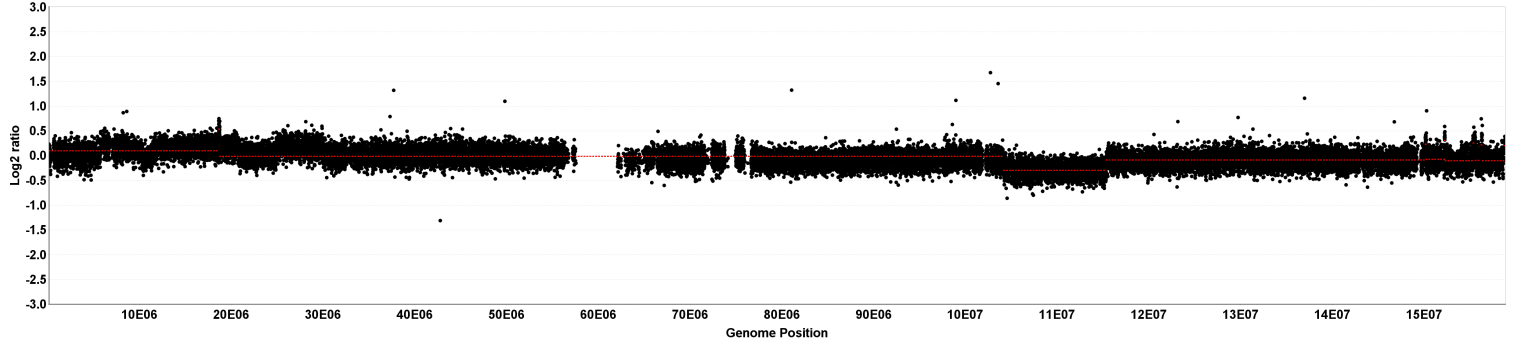

chr8 segmentation for 529552A02\_2013-06-20\_532 vs. 529552A02\_2013-06-20\_635 (529552A02\_2013-06-20\_unavg) - 55 segments

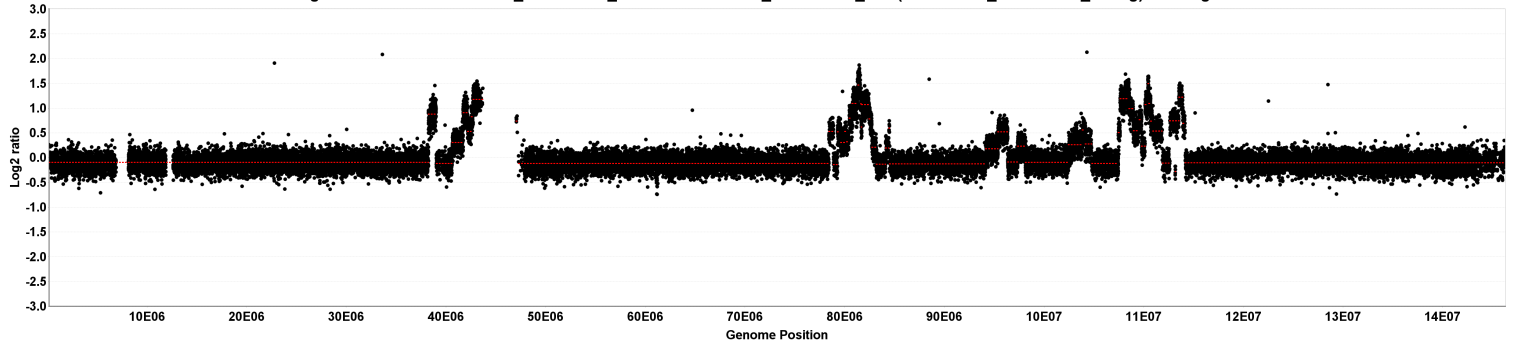

chr9 segmentation for 529552A02\_2013-06-20\_532 vs. 529552A02\_2013-06-20\_635 (529552A02\_2013-06-20\_unavg) - 5 segments

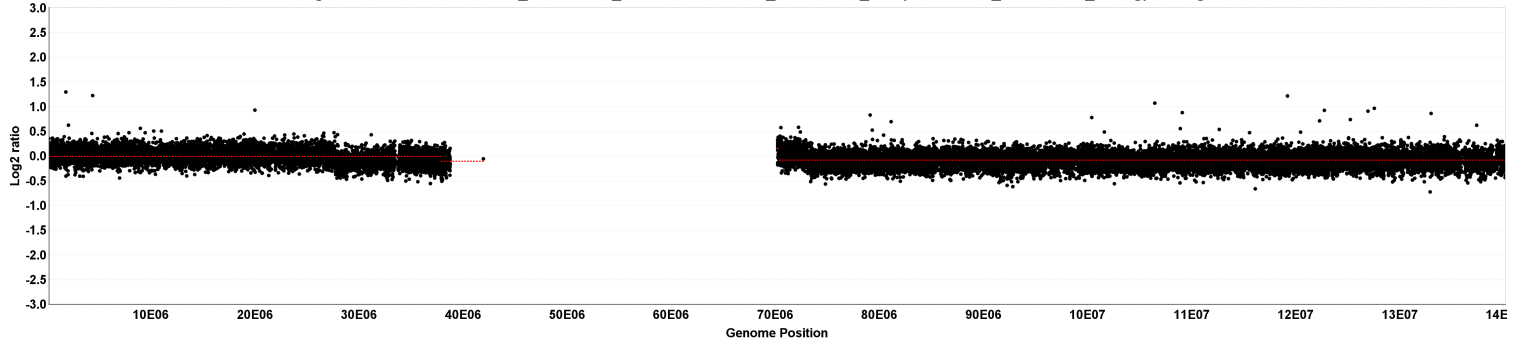

chr10 segmentation for 529552A02\_2013-06-20\_532 vs. 529552A02\_2013-06-20\_635 (529552A02\_2013-06-20\_unavg) - 13 segments

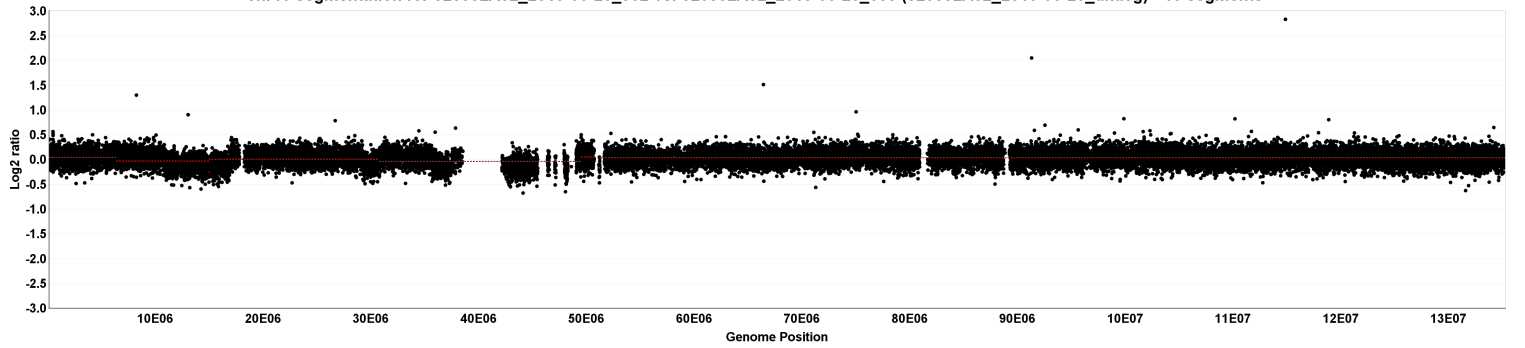

chr11 segmentation for 529552A02\_2013-06-20\_532 vs. 529552A02\_2013-06-20\_635 (529552A02\_2013-06-20\_unavg) - 10 segments

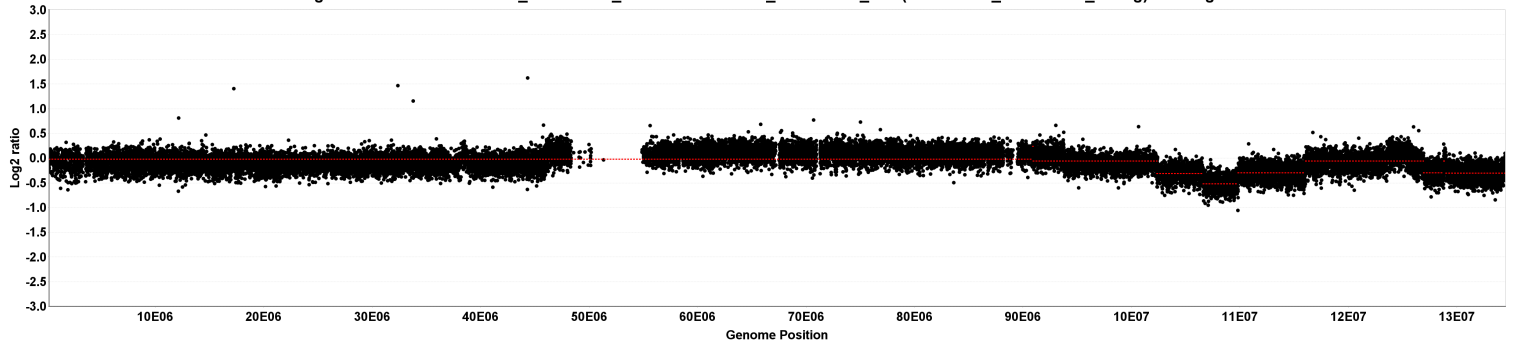

chr12 segmentation for 529552A02\_2013-06-20\_532 vs. 529552A02\_2013-06-20\_635 (529552A02\_2013-06-20\_unavg) - 7 segments

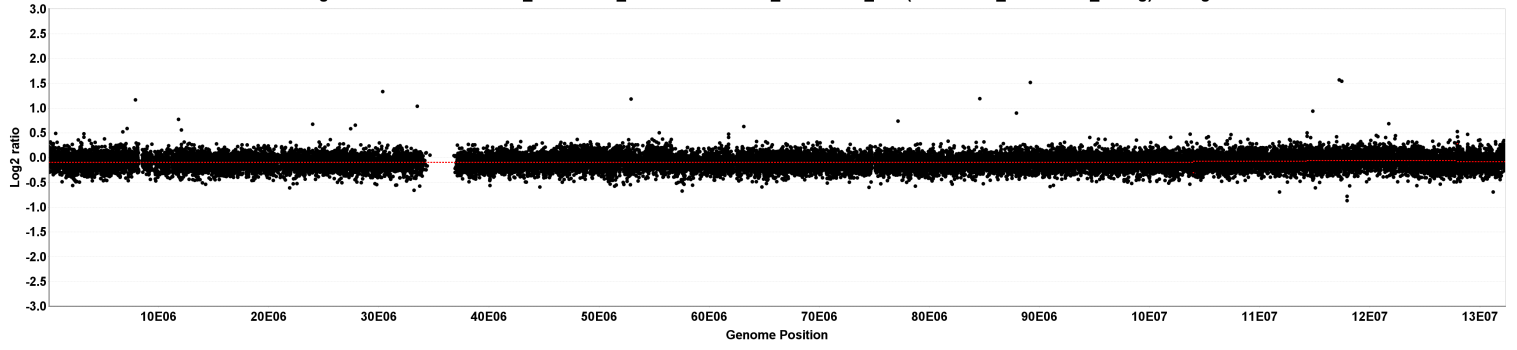

chr13 segmentation for 529552A02\_2013-06-20\_532 vs. 529552A02\_2013-06-20\_635 (529552A02\_2013-06-20\_unavg) - 1 segment

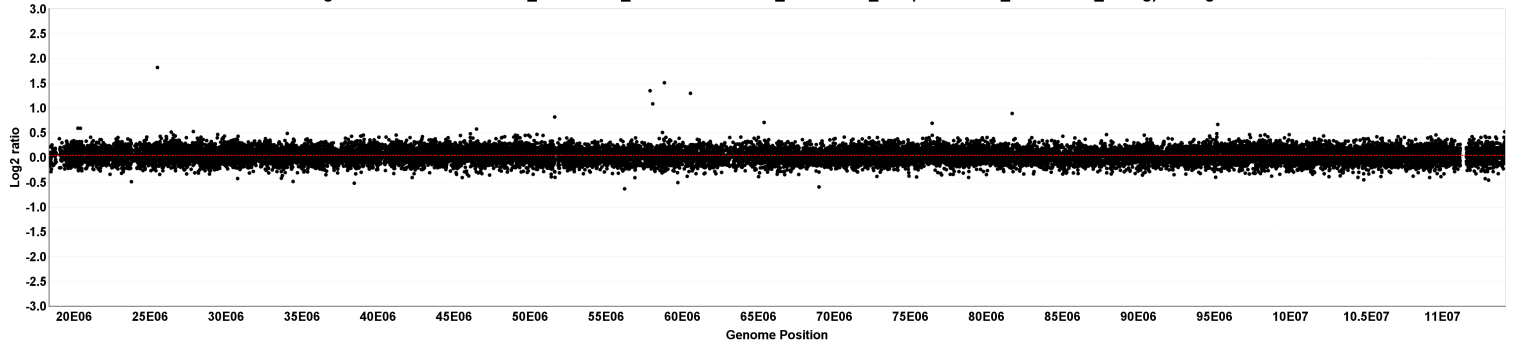

chr14 segmentation for 529552A02\_2013-06-20\_532 vs. 529552A02\_2013-06-20\_635 (529552A02\_2013-06-20\_unavg) - 11 segments

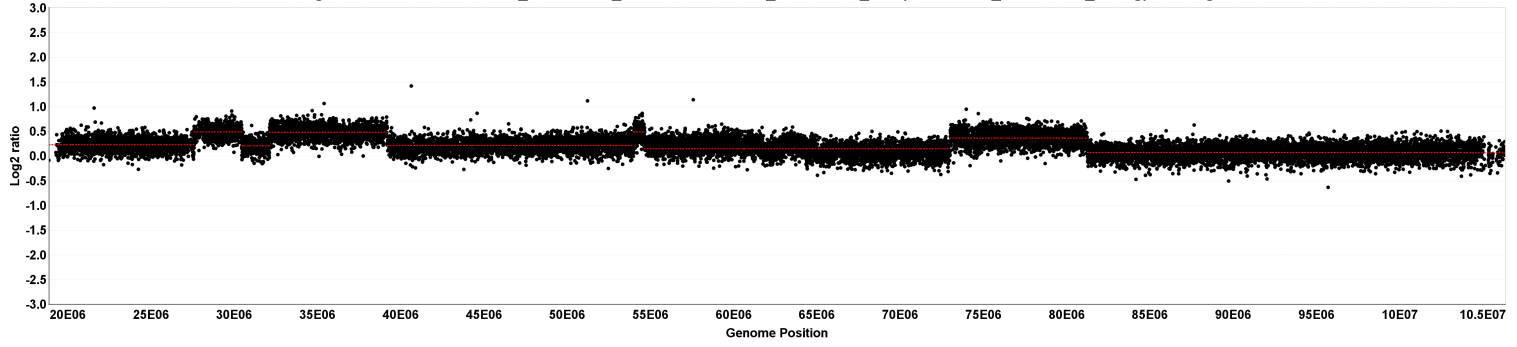

chr15 segmentation for 529552A02\_2013-06-20\_532 vs. 529552A02\_2013-06-20\_635 (529552A02\_2013-06-20\_unavg) - 8 segments

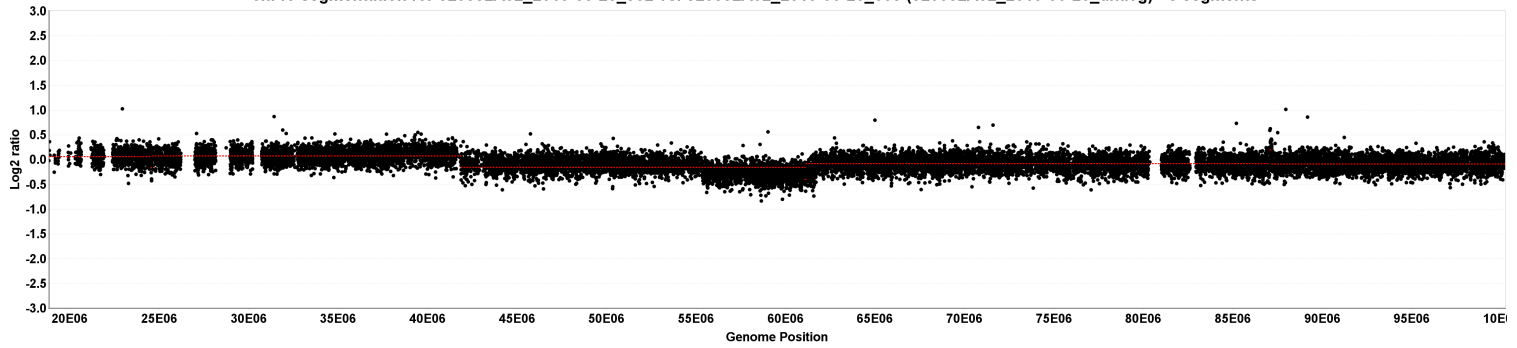

chr16 segmentation for 529552A02\_2013-06-20\_532 vs. 529552A02\_2013-06-20\_635 (529552A02\_2013-06-20\_unavg) - 7 segments

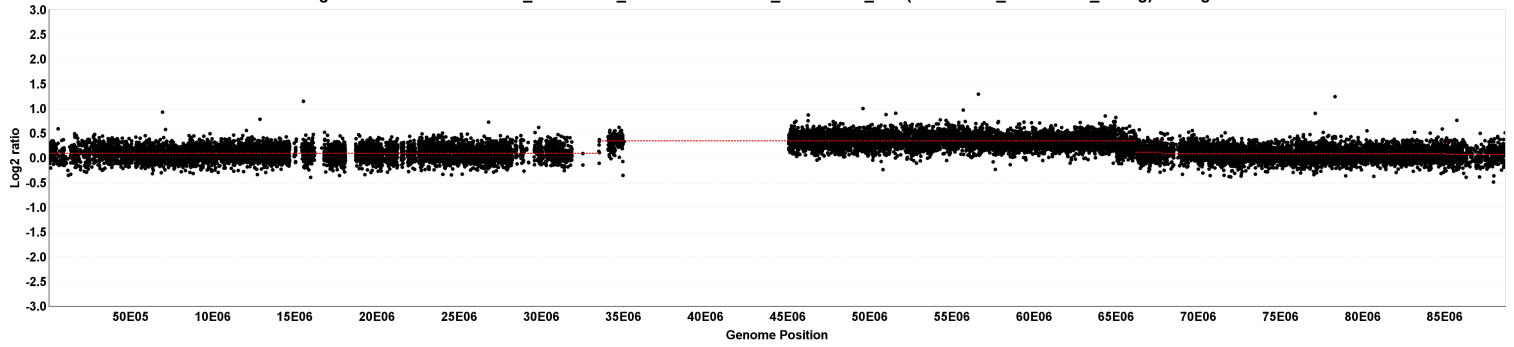

chr17 segmentation for 529552A02\_2013-06-20\_532 vs. 529552A02\_2013-06-20\_635 (529552A02\_2013-06-20\_unavg) - 5 segments

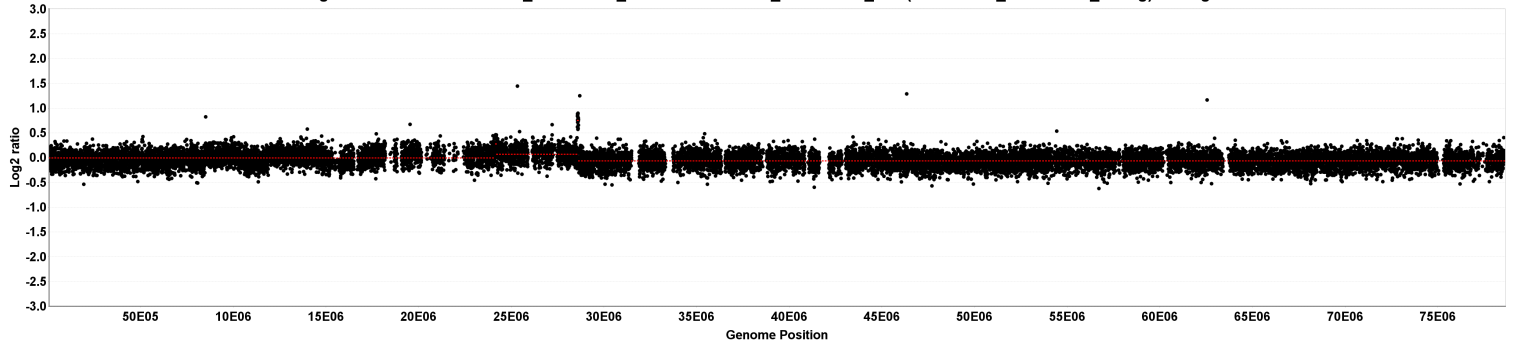

chr18 segmentation for 529552A02\_2013-06-20\_532 vs. 529552A02\_2013-06-20\_635 (529552A02\_2013-06-20\_unavg) - 1 segment

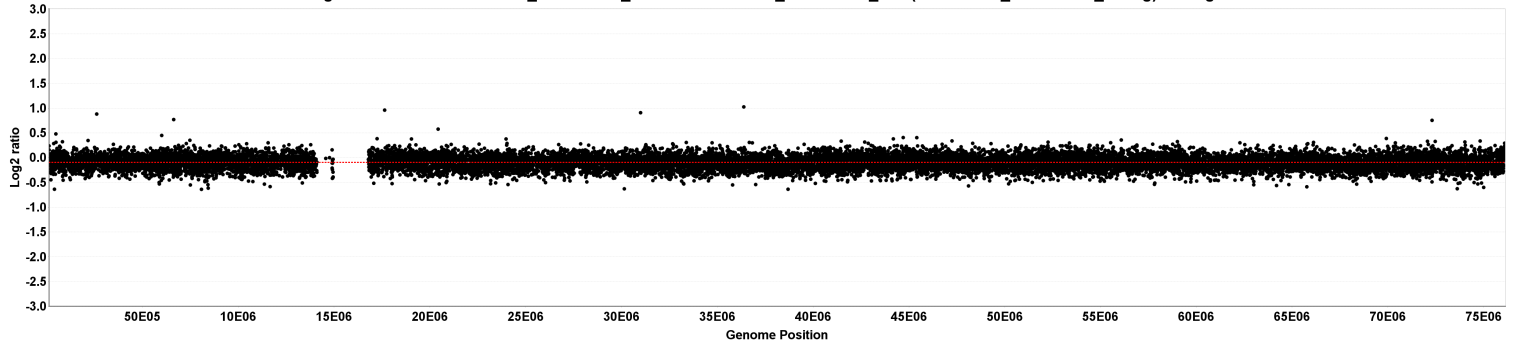

chr19 segmentation for 529552A02\_2013-06-20\_532 vs. 529552A02\_2013-06-20\_635 (529552A02\_2013-06-20\_unavg) - 10 segments

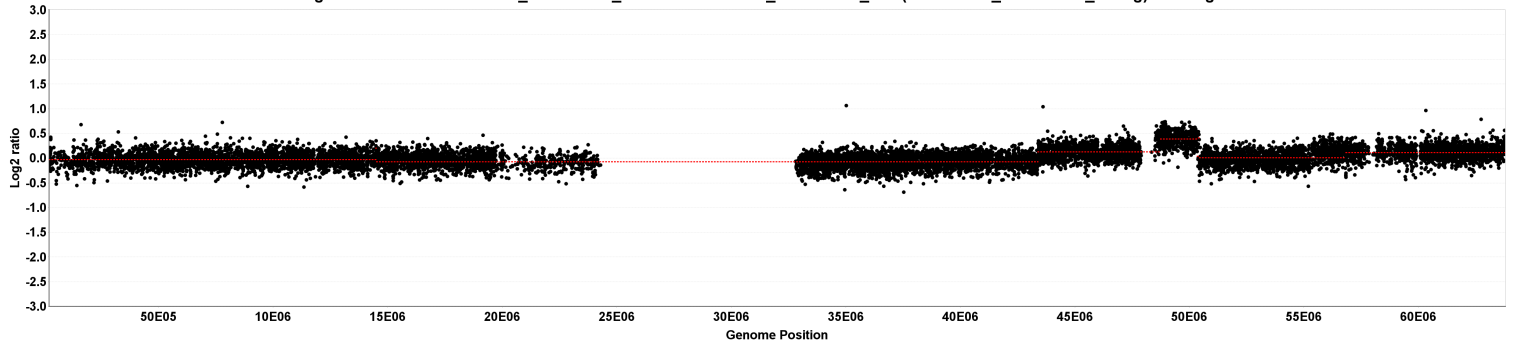

chr20 segmentation for 529552A02\_2013-06-20\_532 vs. 529552A02\_2013-06-20\_635 (529552A02\_2013-06-20\_unavg) - 9 segments

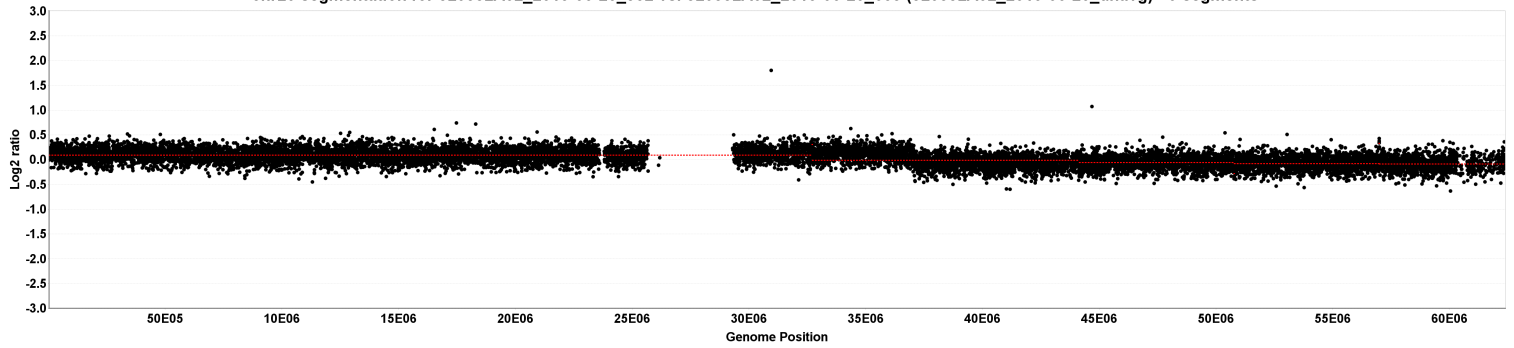

chr21 segmentation for 529552A02\_2013-06-20\_532 vs. 529552A02\_2013-06-20\_635 (529552A02\_2013-06-20\_unavg) - 14 segments

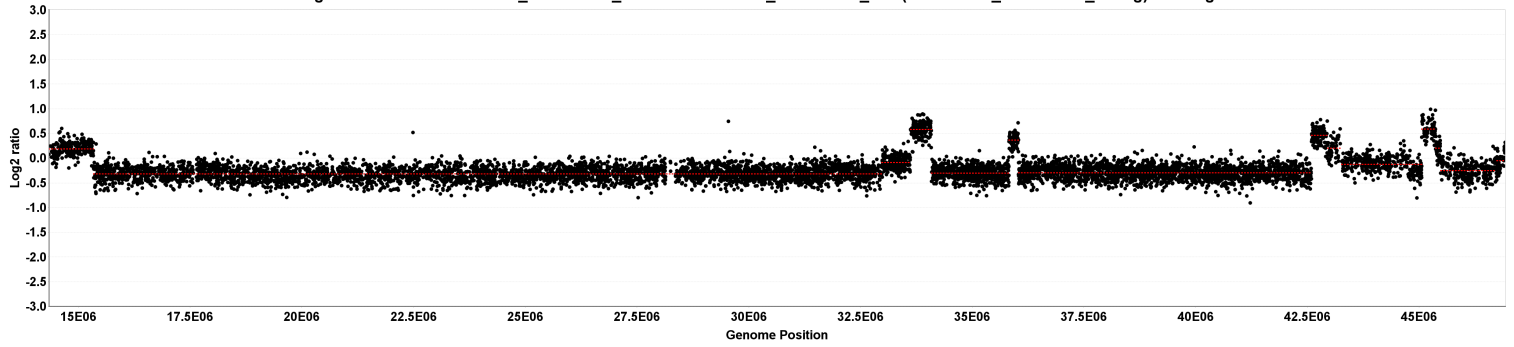

chr22 segmentation for 529552A02\_2013-06-20\_532 vs. 529552A02\_2013-06-20\_635 (529552A02\_2013-06-20\_unavg) - 30 segments

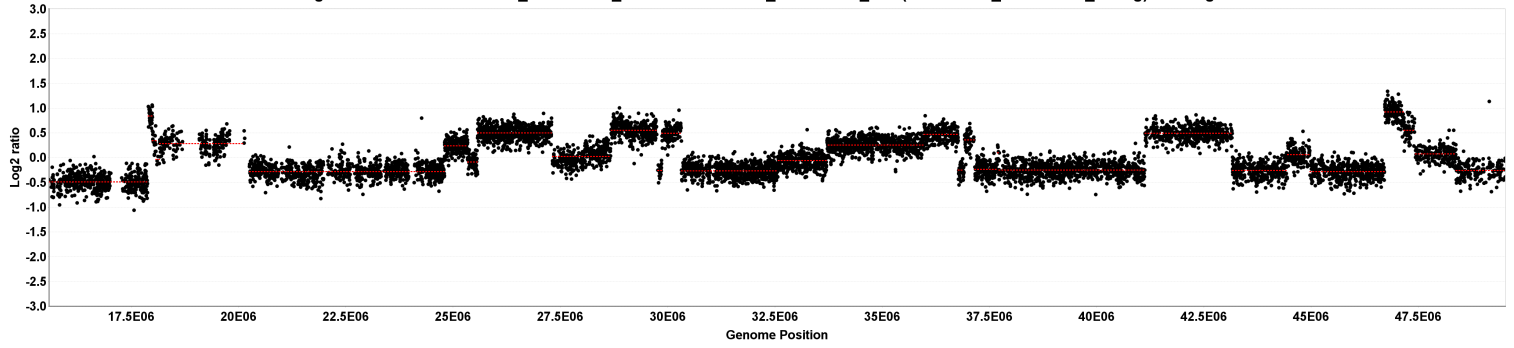

chrX segmentation for 529552A02\_2013-06-20\_532 vs. 529552A02\_2013-06-20\_635 (529552A02\_2013-06-20\_unavg) - 8 segments

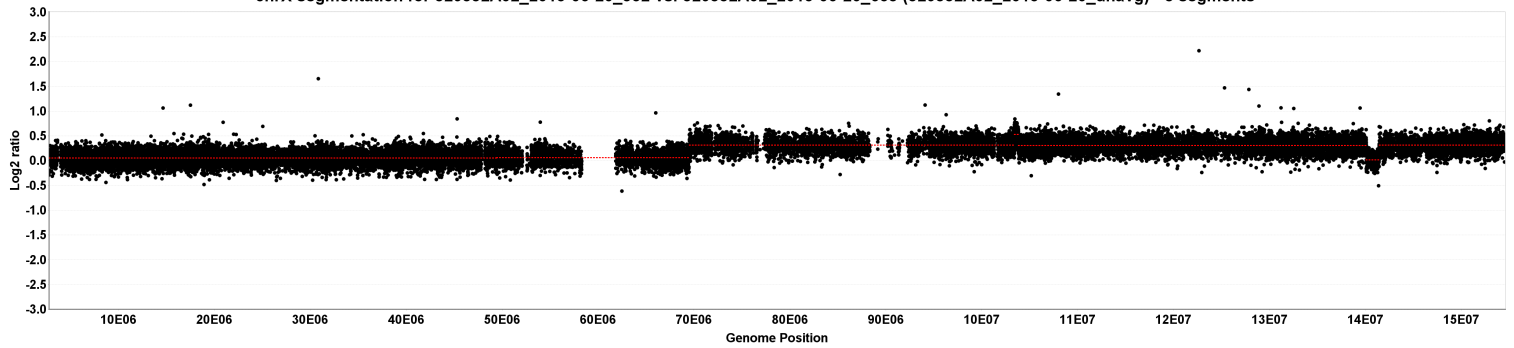

chrY segmentation for 529552A02\_2013-06-20\_532 vs. 529552A02\_2013-06-20\_635 (529552A02\_2013-06-20\_unavg) - 3 segments

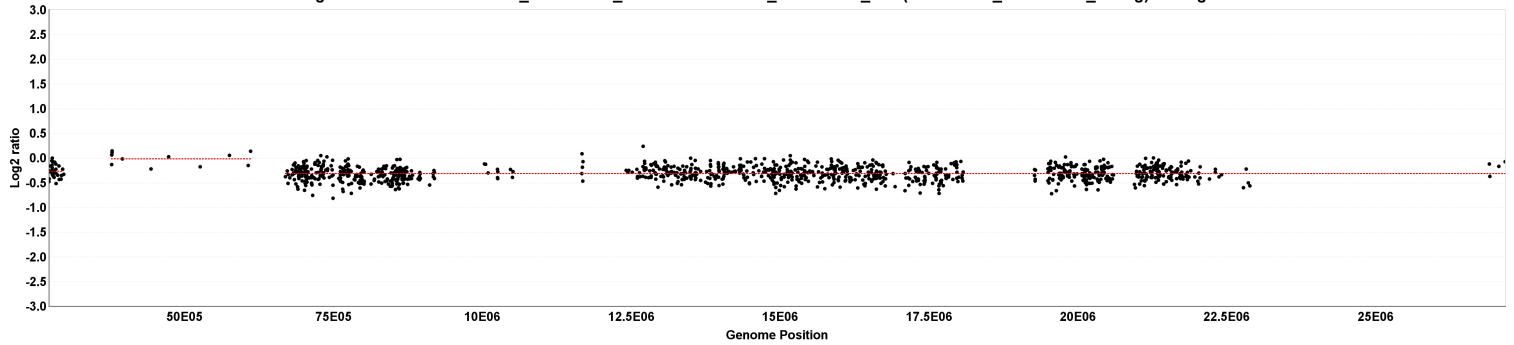

Supplement: pone.0169098.s004.pdf [file pone.0169098.s004.pdf]
